# Supplementary material
Source: PubMed Central journal article supplement (PMC4485544)
Supplement: NIHMS679766-supplement-5.pdf [file NIHMS679766-supplement-5.pdf]

**Table 7A (Supplementary) Results of the prevalent and incident analyses for nuclear and cortical cataracts. a. Odds ratios for prevalence of nuclear and cortical cataracts for the nutrients that were found to be statistically significant. b. Hazards ratios for incidence of nuclear and cortical cataracts adjusted for energy intake in non-Centrum users for the nutrients that were found to be statistically significant. c. Hazards ratios for incidence of nuclear, cortical and posterior subcapsular cataracts for the nutrients that were found to be statistically significant in Centrum-user, adjusting for energy intake.**

| Analysis                               | Nutrient   | Quintile | Ratio (95%CL)     |                   |
|----------------------------------------|------------|----------|-------------------|-------------------|
| <b>a, Prevalence</b>                   |            |          |                   |                   |
| Mild nuclear                           | Riboflavin | 2        | 1.05 (0.84-1.30)  |                   |
|                                        |            | 3        | 0.86 (0.69-1.07)  |                   |
|                                        |            | 4        | 0.89 (0.72-1.11)  |                   |
|                                        |            | 5        | 0.78 (0.63-0.97)  |                   |
|                                        |            | B12      | 2                 | 0.80 (0.64-0.99)  |
|                                        |            | 3        | 0.82 (0.67-1.02)  |                   |
|                                        |            | 4        | 0.74 (0.60-0.92)  |                   |
|                                        |            | 5        | 0.78 (0.63-0.96)  |                   |
| Mild cortical                          | Riboflavin | 2        | 0.98 (0.80-1.21)  |                   |
|                                        |            | 3        | 0.91 (0.75-1.12)  |                   |
|                                        |            | 4        | 0.87 (0.71-1.07)  |                   |
|                                        |            | 5        | 0.80 (0.65-0.99)  |                   |
|                                        |            | B12      | 2                 | 0.93 (0.76-1.14)  |
|                                        |            | 3        | 0.90 (0.73-1.10)  |                   |
|                                        |            | 4        | 0.82 (0.66-1.00)  |                   |
|                                        |            | 5        | 0.77 (0.63-0.95)  |                   |
| Moderate nuclear                       | Riboflavin | 2        | 0.79 (0.53-1.16)  |                   |
|                                        |            | 3        | 0.61 (0.41-0.90)  |                   |
|                                        |            | 4        | 0.80 (0.55-1.15)  |                   |
|                                        |            | 5        | 0.62 (0.43-0.90)  |                   |
|                                        |            | B12      | 2                 | 0.48 (0.33-0.72)  |
|                                        |            |          | 3                 | 0.61 (0.42-0.88)  |
|                                        |            |          | 4                 | 0.55 (0.38-0.80)  |
|                                        |            |          | 5                 | 0.62 (0.43-0.88)  |
|                                        | B6         | 2        | 0.78 (0.53-1.14)  |                   |
|                                        |            |          | 3                 | 0.66 (0.44-0.99)  |
|                                        |            | 4        | 0.61 (0.41-0.90)  |                   |
|                                        |            | 5        | 0.67 (0.45-0.99)  |                   |
| <b>b. Incidence, Centrum non-users</b> |            |          |                   |                   |
| Mild nuclear                           | Niacin     | 2        | 0.78 (0.60, 1.03) |                   |
|                                        |            | 3        | 0.74 (0.56, 0.96) |                   |
|                                        |            | 4        | 0.77 (0.59, 1.00) |                   |
|                                        |            | 5        | 0.69 (0.52, 0.92) |                   |
|                                        |            | B12      | 2                 | 0.68 (0.44, 1.05) |
|                                        |            | 3        | 0.66 (0.43, 1.02) |                   |
|                                        |            | 4        | 0.67 (0.45, 0.99) |                   |
|                                        |            | 5        | 0.56 (0.37, 0.83) |                   |
| <b>c. Incidence, Centrum users</b>     |            |          |                   |                   |
| Mild PSC                               | Folate     | 2        | 1.35 (0.89, 2.04) |                   |
|                                        |            | 3        | 1.17 (0.77, 1.79) |                   |
|                                        |            | 4        | 1.62 (1.09, 2.41) |                   |
|                                        |            | 5        | 1.61 (1.08, 2.41) |                   |
